# Supplementary material for: Benefits of Elective Para-Aortic Radiotherapy for pN1 Prostate Cancer Using Arc Therapy (Intensity-Modulated or Volumetric Modulated Arc Therapy): Protocol for a Nonrandomized Phase II Trial
Source: PubMed Central journal article supplement (PMC6315267; doi:10.2196/11256), 2018-12-13
Supplement: resprot_v7i12e11256_app2.pdf [file resprot_v7i12e11256_app2.pdf]

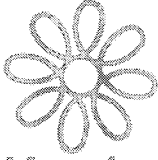

To whom it may concern,

The Board of Directors of Kom op tegen Kanker (Stand up to Cancer), the Flemish cancer society, has decided, on the advice of the biomedical committee, to support the project:

**'Elective para-aortic radiation as part of combination therapy in prostate cancer patients with positive pelvic lymph nodes: a new step to improve clinical relapse free survival'.**

Start project: 15/11/2016

Duration project: 48 months (14/11/2020)

Funding: 269.304 €

Principal Investigator: Professor Gert De Meerleer

Marc Michils

General Director Kom op tegen Kanker
